# Supplementary material
Source: Copernicus journal article supplement (doi:10.5194/egusphere-2026-2137)
Supplement: Supplementary file 1 [file FigureS1.pdf › FigureS1.pdf]

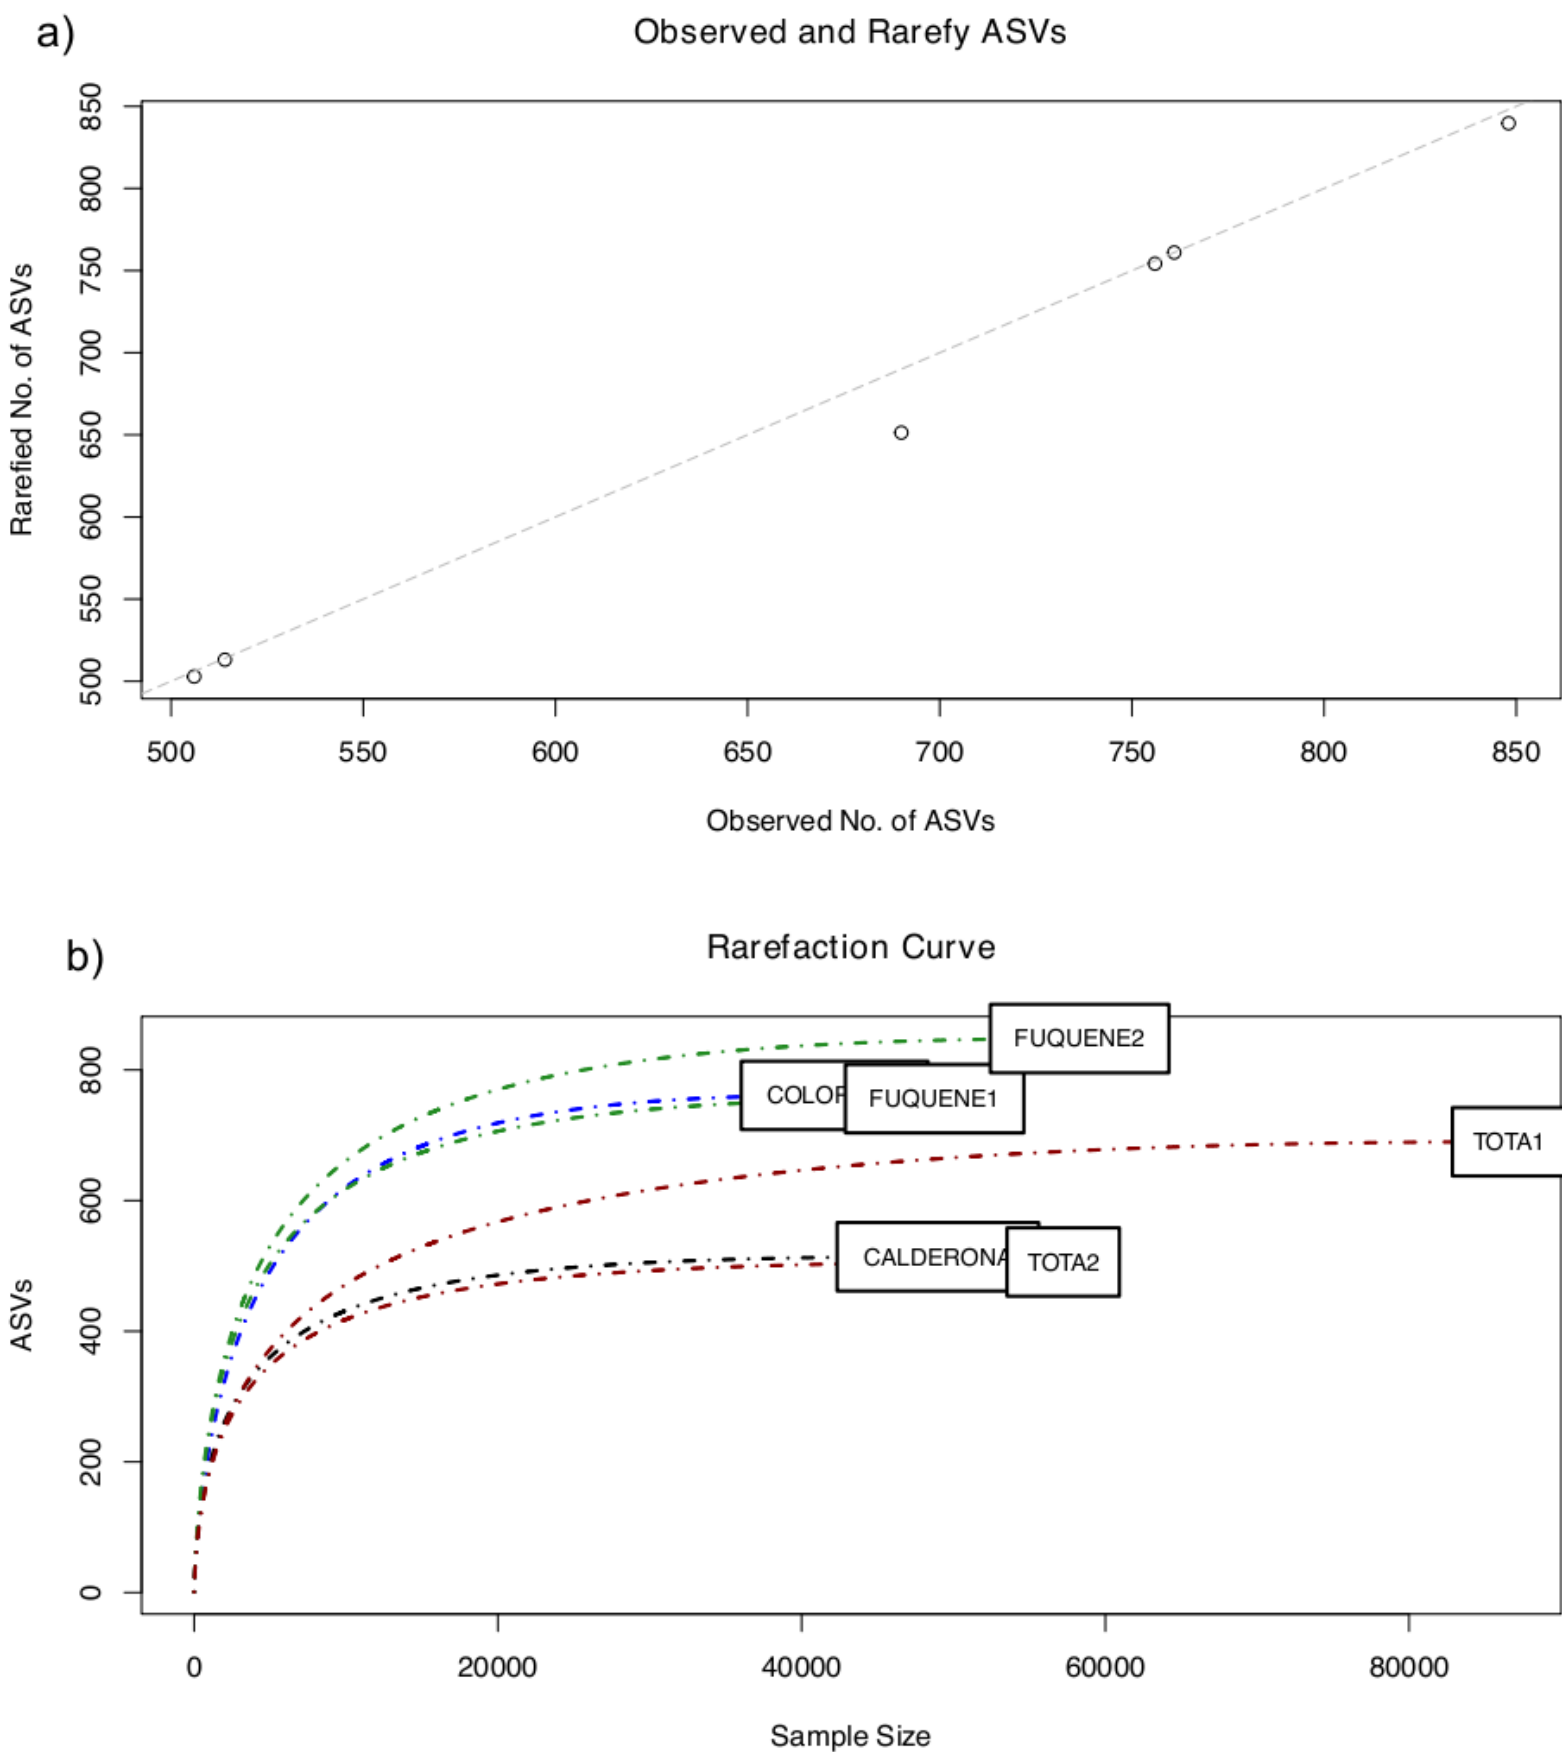

Figure S1: Summary for rarefaction analysis of (a) observed vs. rarified number of ASVs, and (b) rarefaction curves for the aquatic samples studied.
